# Supplementary material
Source: Springer Nature journal article supplement (https://www.springermedizin.de/resource/supplementary/13054_2011_515_MOESM3_ESM.pdf/9708712)

**Stomach**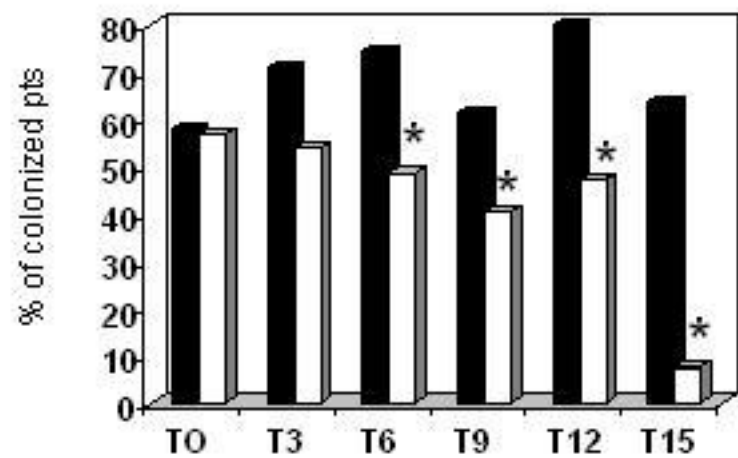**Rectum**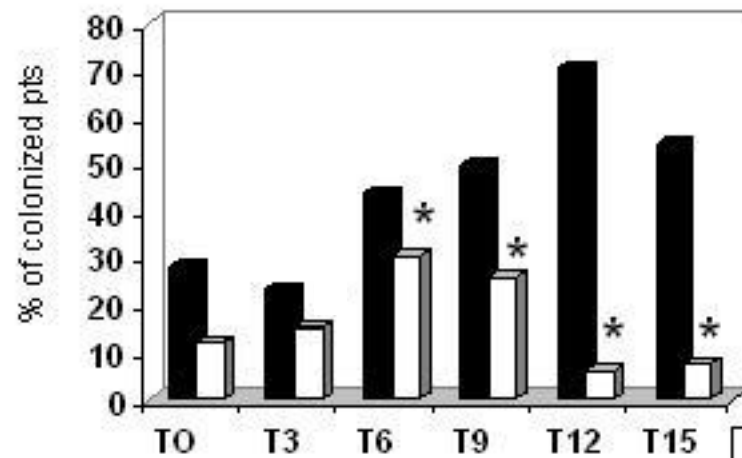**Trachea**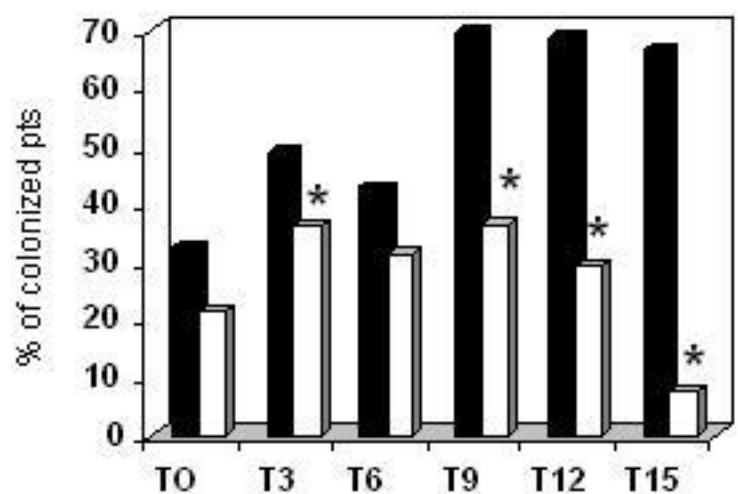**Urine**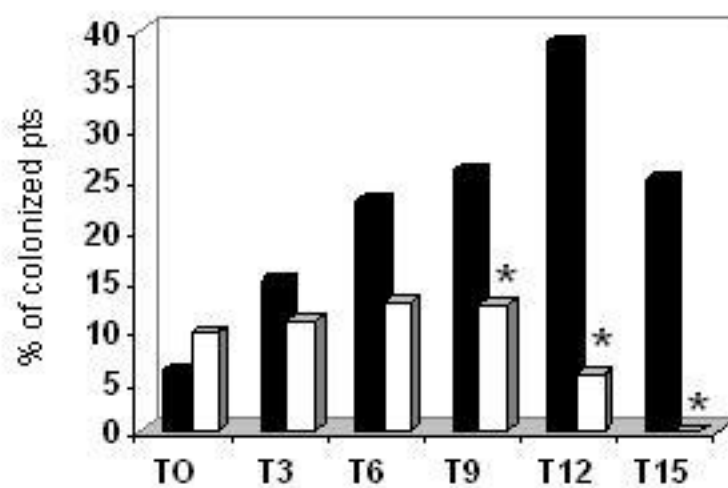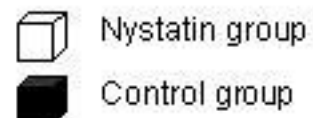

Supplement: MOESM3 [file 9708712]
